# Supplementary material for: Multi-layered cement-hydrogel composite with high toughness, low thermal conductivity, and self-healing capability
Source: PubMed Central journal article supplement (PMC10257691; doi:10.1038/s41467-023-39235-5), 2023-06-10
Supplement: 41467_2023_39235_MOESM1_ESM.pdf [file 41467_2023_39235_MOESM1_ESM.pdf]

## Supplementary Information

# Multi-layered cement-hydrogel composite with high toughness, low thermal conductivity, and self-healing capability

Yuan Chen <sup>a</sup>, Yangzezhi Zheng <sup>b</sup>, Yang Zhou <sup>a\*</sup>, Wei Zhang <sup>c\*</sup>, Weihuan Li <sup>a</sup>, Wei She <sup>a</sup>, Jiaping Liu <sup>a</sup>, Changwen Miao <sup>a</sup>

<sup>a</sup> Jiangsu Key Laboratory of Construction Materials, School of Materials Science and Engineering, Southeast University, Nanjing 211189, China

<sup>b</sup> School of Transportation, Southeast University, Nanjing 211189, China

<sup>c</sup> Jiangsu Key Laboratory of Advanced Metallic Materials, School of Materials Science and Engineering, Southeast University, Nanjing 211189, China

\* corresponding author

### Supplementary Figure

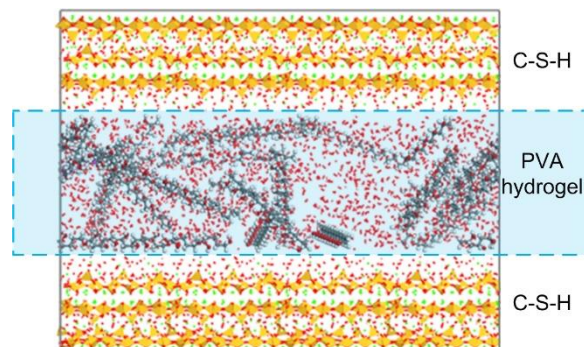

Supplementary Figure 1 A molecular dynamics simulation model for the interfacial interactions between a calcium silicate hydrate (C-S-H) matrix and polyvinyl alcohol (PVA) hydrogels in Materials Studio.

## Supplementary Methods

The Clay Force Field (ClayFF) and Consistent Valence Force Field (CVFF) were employed to simulate the energy, structure, and dynamic properties of the C-S-H and PVA model, respectively.

In ClayFF force field, the interaction parameters between the different atoms are obtained according to the arithmetic mean rule for the distance parameter,  $R_0$ , and the geometric mean rule for the energy parameter,  $D_0$ :

$$R_{0,ij} = \frac{1}{2}(R_{0,i} + R_{0,j}) \quad (1)$$

$$D_{0,ij} = \sqrt{D_{0,i}D_{0,j}} \quad (2)$$

The short-range interactions are described by van der Waals energy represented via Lennard-Jones potential:

$$E_{VDW} = \sum_{i \neq j} D_{0,ij} \left[ \left( \frac{R_{0,ij}}{r_{ij}} \right)^{12} - 2 \left( \frac{R_{0,ij}}{r_{ij}} \right)^6 \right] \quad (3)$$

The Coulombic potential is represented by:

$$E_{Coul} = \frac{e^2}{4\pi\epsilon_0} \sum_{i \neq j} \frac{q_i q_j}{r_{ij}} \quad (4)$$

where the partial charges  $q_i$  and  $q_j$  can be referred to Supplementary Table 1,  $e$  is the charge of the electron, and  $\epsilon_0$  is the dielectric permittivity of vacuum ( $8.85419 \times 10^{-12}$  F/m).

The bond stretch can angle bend in water molecules and hydroxyl groups can be described by simple harmonic potentials:

$$E_{bond \ stretch \ ij} = k_1(r_{ij} - r_0)^2 \quad (5)$$

$$E_{angle \ bend \ ijk} = k_2(\theta_{ijk} - \theta_0)^2 \quad (6)$$

where  $k_1$  and  $k_2$  are radial and angular stiffness, respectively. Parameters  $r_0$  and  $\theta_0$  represent the equilibrium hydroxyl bond length and H-O-H angle in water molecules, respectively. (see Supplementary Table 2 and Table 3)

Supplementary Table 1 Non-bond Parameters for ClayFF Force Field

| species             | Symbol | Charge (e) | D <sub>0</sub> (kcal/mol) | R <sub>0</sub> (Å) |
|---------------------|--------|------------|---------------------------|--------------------|
| hydroxide calcium   | cah    | 1.050      | 5.0298*10 <sup>-6</sup>   | 6.2428             |
| aqueous calcium ion | Ca     | 2.000      | 0.1                       | 3.2237             |
| tetrahedral silicon | st     | 2.100      | 1.8405*10 <sup>-6</sup>   | 3.7064             |
| bridging oxygen     | ob     | -1.050     | 0.1554                    | 3.5532             |
| hydroxyl oxygen     | oh     | -0.950     | 0.1554                    | 3.5532             |
| water oxygen        | o*     | -0.820     | 0.1554                    | 3.5532             |
| water hydrogen      | h*     | 0.410      |                           |                    |
| hydroxyl hydrogen   | ho     | 0.425      |                           |                    |

Supplementary Table 2 Bond-stretch of water and hydroxyl groups for ClayFF Force Field

| species i | species j | k <sub>1</sub> (kcal/mol/Å <sup>2</sup> ) | r <sub>0</sub> (Å) |
|-----------|-----------|-------------------------------------------|--------------------|
| h*        | o*        | 554.1349                                  | 1.0000             |
| ho        | oh        | 554.1349                                  | 1.0000             |

Supplementary Table 3 Angle bend of water for ClayFF Force Field

| species i | species j | species k | k <sub>2</sub> (kcal/mol/ θ <sup>2</sup> ) | θ <sub>0</sub> |
|-----------|-----------|-----------|--------------------------------------------|----------------|
| h*        | o*        | h*        | 45.7696                                    | 109.47         |

In CVFF force field, non-bonded potential energy interactions  $E_{ij}$  between atoms  $i$  and  $j$  separated by a distance  $r$  were calculated according to:

$$E_{ij} = \frac{q_i q_j}{r} + 4\epsilon_{ij} \left[ \left( \frac{\sigma_{ij}}{r} \right)^{12} - \left( \frac{\sigma_{ij}}{r} \right)^6 \right] \quad (7)$$

where  $\sigma_{ij} = \sqrt{\sigma_i \sigma_j}$  and  $\epsilon_{ij} = \sqrt{\epsilon_i \epsilon_j}$  represent the van der Waals radius and energy well depth for the atomic pair. These parameters are given in Supplementary Table 4-7.

Supplementary Table 4 Non-bond Parameters for CVFF Force Field

| species                                   | Symbol | Charge (e) | D <sub>0</sub> (kJ/mol) | R <sub>0</sub> (Å) |
|-------------------------------------------|--------|------------|-------------------------|--------------------|
| methyl carbon                             | c3     | -0.300     | 0.163                   | 3.8754             |
| sp <sup>3</sup> carbon bonded to 2H atoms | c2     | -0.200     | 0.163                   | 3.8754             |
| sp <sup>3</sup> carbon bonded to 1H atom  | c1     | 0.578      | 0.163                   | 3.8754             |
| hydrogen bonded to C                      | h      | 0.100      | 0.159                   | 2.4500             |
| hydrogen bonded to O                      | ho     | 0.350      | 0.000                   | 0.0000             |
| hydroxyl oxygen                           | oh     | -0.380     | 0.650                   | 3.1655             |

Supplementary Table 5 Bond-stretch for CVFF Force Field  $E_{bond} = k_1(r - r_0)^2$ 

| species i | species j | $k_1$ (kJ/mol/Å <sup>2</sup> ) | $r_0$ (Å) |
|-----------|-----------|--------------------------------|-----------|
| c3        | c2        | 1350.2                         | 1.526     |
| c3        | h         | 1425.1                         | 1.105     |
| c2        | oh        | 1606.7                         | 1.420     |
| c2        | h         | 1425.1                         | 1.105     |
| oh        | ho        | 2317.7                         | 1.000     |

Supplementary Table 6 Angle bend for CVFF Force Field  $E_{angle} = k_2(\theta - \theta_0)^2$ 

| species i | species j | species k | $k_2$ (kJ/mol/rad <sup>2</sup> ) | $\theta_0$ (deg) |
|-----------|-----------|-----------|----------------------------------|------------------|
| h         | c3        | c2        | 185.8                            | 110.0            |
| h         | c3        | h         | 165.3                            | 106.4            |
| c3        | c2        | oh        | 292.9                            | 109.5            |
| h         | c2        | c3        | 185.8                            | 110.0            |
| h         | c2        | oh        | 238.5                            | 109.5            |
| h         | c2        | h         | 165.3                            | 106.4            |
| c2        | oh        | ho        | 244.8                            | 106.0            |
| c2        | c2        | c2        | 195.0                            | 110.5            |
| c2        | c2        | h         | 185.8                            | 110.0            |

Supplementary Table 7 Dihedral bend for CVFF Force Field  $E_{dihedral} = k_3[1 + \cos(n\phi)]$ 

| species i | species j | species k | species l | $k_3$ (KJ/mol) | d | n |
|-----------|-----------|-----------|-----------|----------------|---|---|
| h         | c3        | c2        | oh        | 0.6615         | 1 | 3 |
| h         | c3        | c2        | h         | 0.6615         | 1 | 3 |
| c3        | c2        | oh        | ho        | 0.5439         | 1 | 3 |
| h         | c2        | oh        | ho        | 0.5439         | 1 | 3 |
| c2        | c2        | c2        | c2        | 0.6615         | 1 | 3 |
| c2        | c2        | c2        | h         | 0.6615         | 1 | 3 |
| h         | c2        | c2        | h         | 0.6615         | 1 | 3 |
