# Supplementary material for: Multi-layered cement-hydrogel composite with high toughness, low thermal conductivity, and self-healing capability
Source: PubMed Central journal article supplement (PMC10257691; doi:10.1038/s41467-023-39235-5), 2023-06-10
Supplement: 41467_2023_39235_MOESM3_ESM.pdf [file 41467_2023_39235_MOESM3_ESM.pdf]

## **Description of Additional Supplementary Files**

File Name: Supplementary Movie 1

Description: Includes the animation of the CSH-PVA interface during molecular dynamics simulations.

File Name: Supplementary Movie 2

Description: Includes the animation of the CSH-PVA model during a uniaxial tensile process of molecular dynamics simulations.

File Name: Supplementary Movie 3

Description: Includes the animation of crack propagation and fracture of cement-hydrogel under three-point bending stress in the FEM simulation.

File Name: Supplementary Movie 4

Description: Includes the animation of crack propagation and fracture of cement paste under three-point bending stress in the FEM simulation.
